# Supplementary material for: Trifluoromethyl-functionalized poly(lactic acid): a fluoropolyester designed for blood contact applications
Source: Royal Society of Chemistry journal article supplement (doi:10.1039/c9bm00353c), 2019-01-01
Supplement: c9bm00353c1.pdf [file c9bm00353c1.pdf]

**Trifluoromethyl-Functionalized Poly(lactic acid): A Fluoropolyester Designed for  
Blood Contact Applications**

*Razieh Khalifehzadeh<sup>1</sup>, Buddy D. Ratner<sup>\*1,2</sup>*

<sup>1</sup>Department of Chemical Engineering, University of Washington, Seattle, USA

<sup>2</sup>Department of Bioengineering, University of Washington, Seattle, USA

\*Corresponding author:

E-mail address: ratner@uw.edu

**Supporting information:**

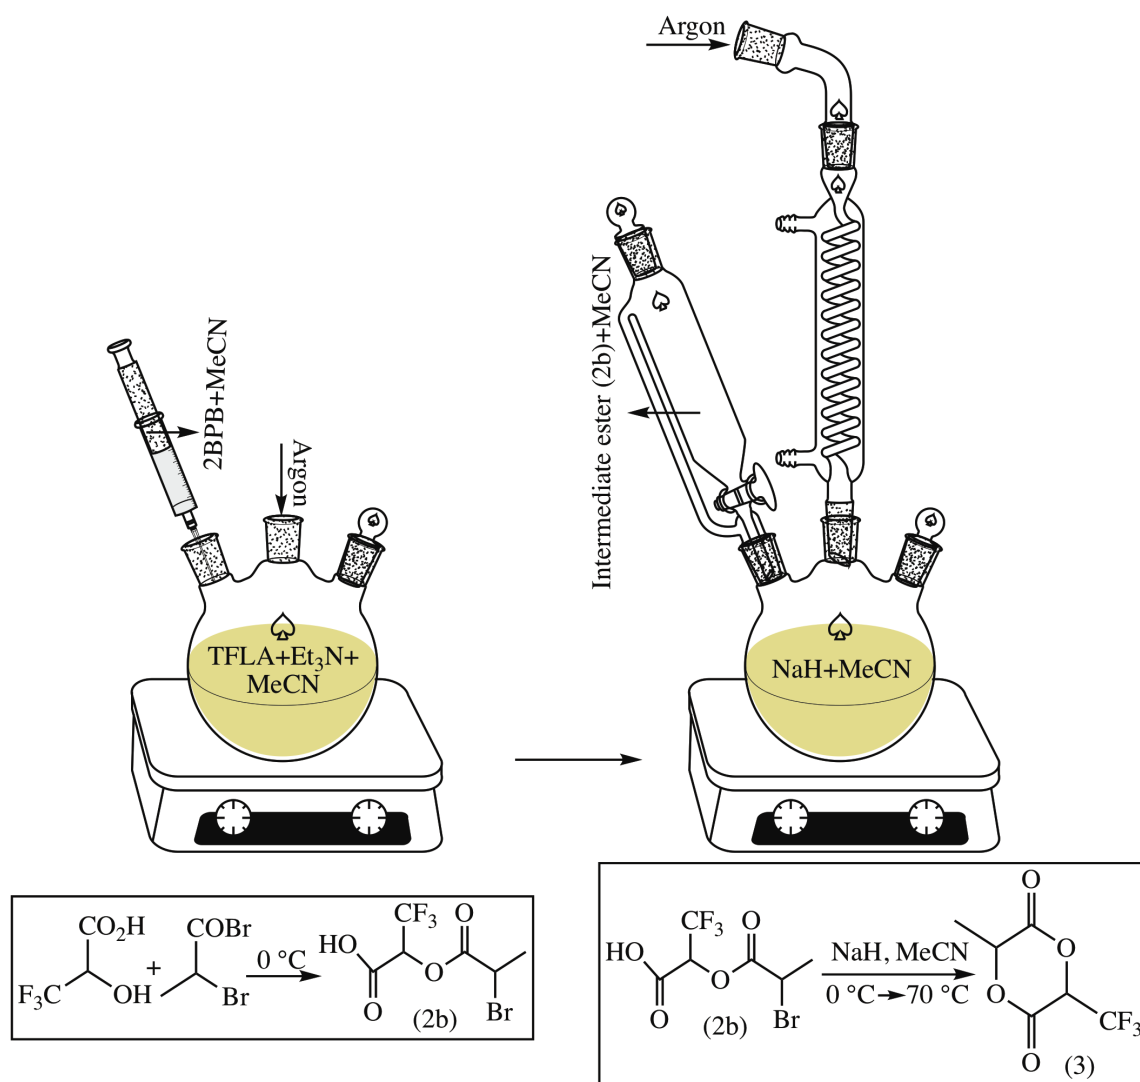

**Figure S1.** Illustration of the reaction setup and synthesis conditions used for preparing trifluoromethyl-functionalized lactide monomer

(a)

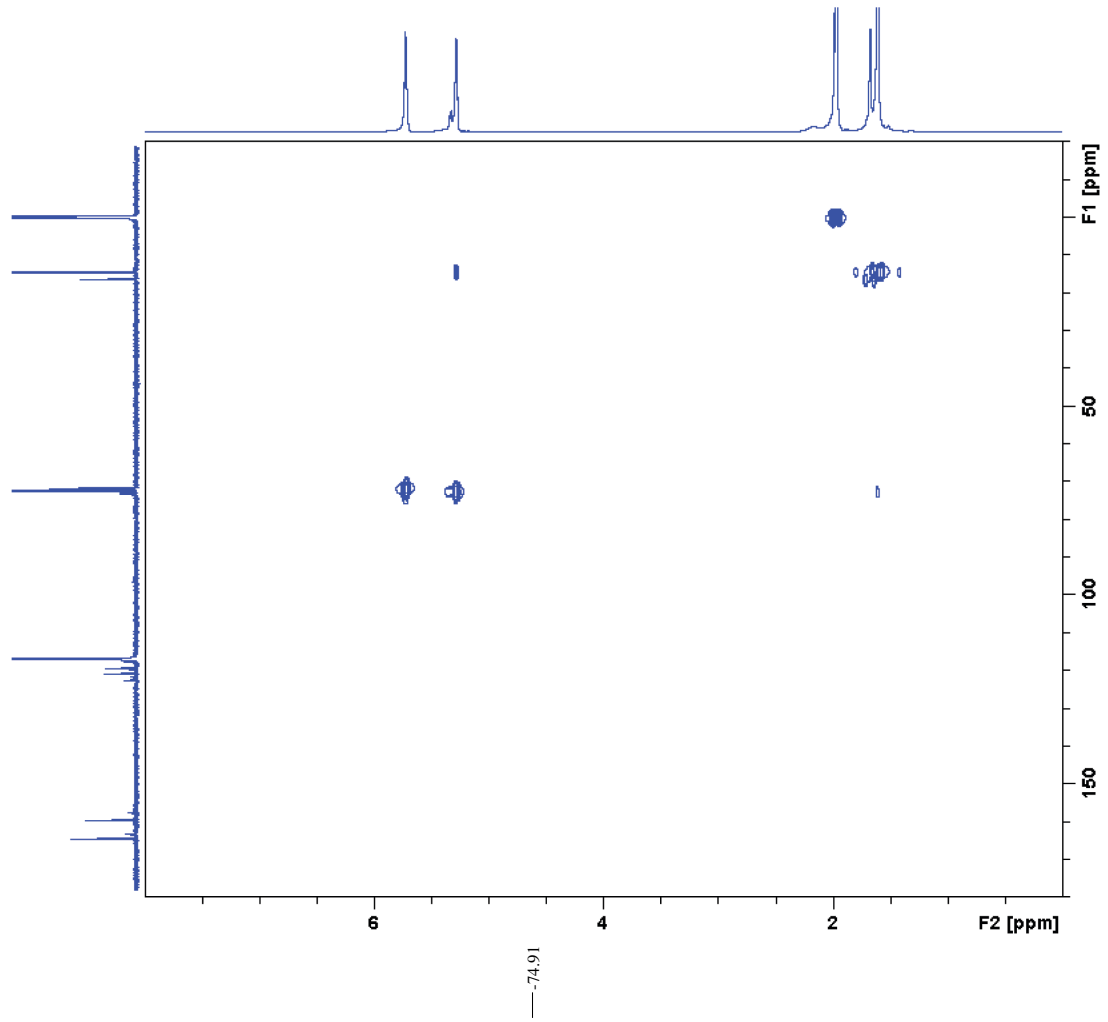

(b)

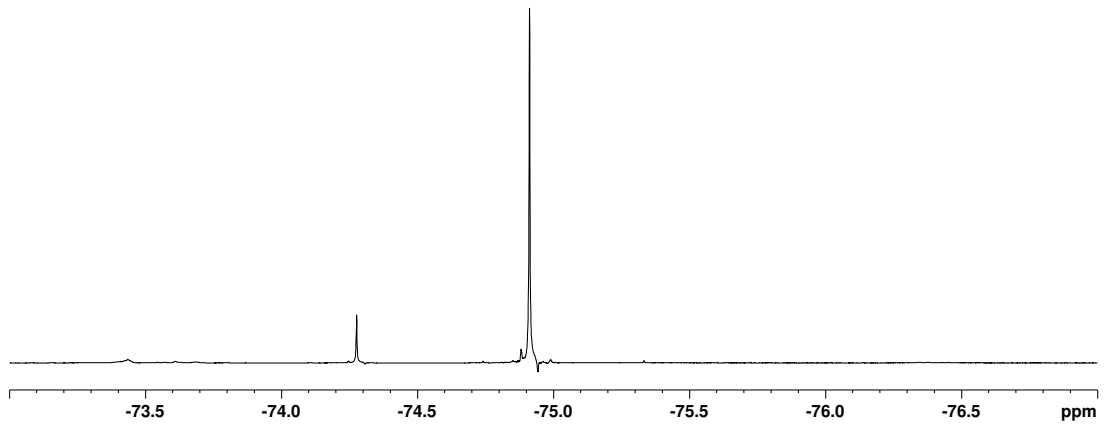

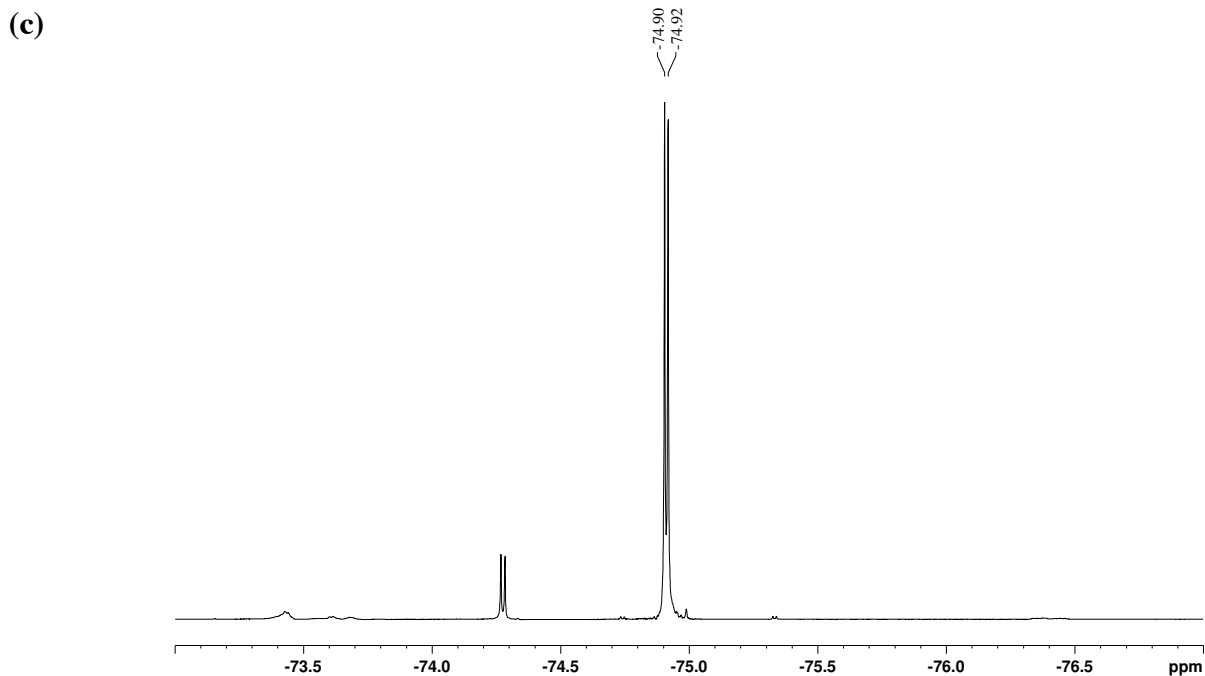

**Figure S2.** (a) 2D-NMR and  $^{19}\text{F}$ -NMR spectrum (700 MHz,  $\text{CD}_3\text{CN}$ ) of trifluoromethyl-functionalized lactide monomer. (b)  $^{19}\text{F}$ -NMR spectrum with  $^1\text{H}$  decoupling and (c)  $^{19}\text{F}$ -NMR spectrum without  $^1\text{H}$  decoupling.

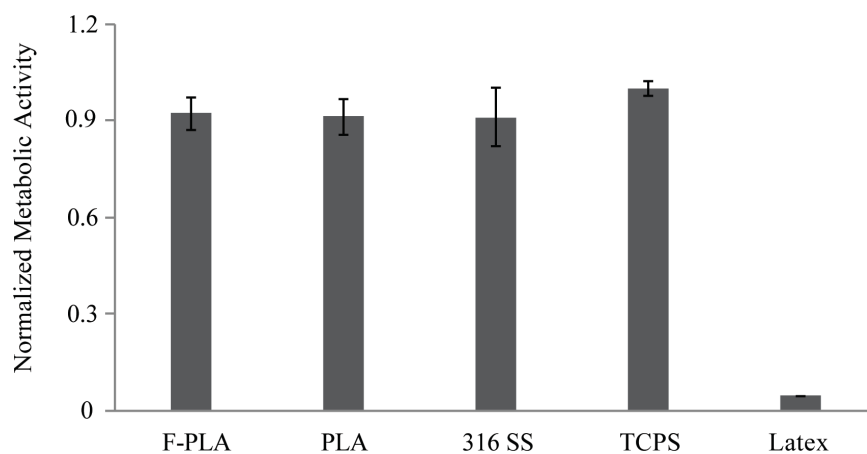

**Figure S3.** The relative metabolic activity of the NIH-3T3 cells incubated with sample extracts for 24h. The results are normalized with respect to the TCPS value. Latex and TCPS were used as positive and negative controls, respectively.
